# Supplementary material for: Long-term Effect of Machine Learning–Triggered Behavioral Nudges on Serious Illness Conversations and End-of-Life Outcomes Among Patients With Cancer: A Randomized Clinical Trial
Source: PubMed Central journal article supplement (PMC9857721; doi:10.1001/jamaoncol.2022.6303), 2023-01-12
Supplement: jamaoncol-e226303-s001.pdf [file jamaoncol-e226303-s001.pdf]

1        **A Stepped-Wedge Cluster Randomized Trial Using Machine-**  
2        **Generated Mortality Estimates and Behavioral Nudges to Promote**  
3        **Advance Care Planning Discussion among Cancer Patients**

4

5

Study Protocol

6

7

June 2019

8

9

10

## **Outline**

11 1. Abstract

12 2. Overall objectives

13 3. Aims

14 3.1 Primary outcome

15 3.2 Secondary outcomes

16 4. Background

17 5. Study design

18 5.1 Design

19 5.2 Study duration

20 5.3 Target population

21 5.4 Accrual

22 5.5 Key inclusion criteria

23 5.6 Key exclusion criteria

24 6. Subject recruitment

25 7. Subject compensation

26 8. Study procedures

27 8.1 Consent

28 8.2 Procedures

29 9. Analysis plan

30 10. Investigators

31 11. Human research protection

32 11.1 Data confidentiality

33 11.2 Subject confidentiality

34 11.3 Subject privacy

|    |                                 |
|----|---------------------------------|
| 35 | 11.4 Data disclosure            |
| 36 | 11.5 Data safety and monitoring |
| 37 | 11.6 Risk/benefit               |
| 38 | 11.6.1 Potential study risks    |
| 39 | 11.6.2 Potential study benefits |
| 40 | 11.6.3 Risk/benefit assessment  |
| 41 |                                 |

## 42 **1. Abstract**

43 Patients with cancer often undergo costly therapy and acute care utilization that is discordant  
44 with their wishes, particularly at the end of life. Early serious illness conversations (SIC)  
45 improve goal-concordant care, and accurate prognostication is critical to inform the timing and  
46 content of these discussions. In this project, we will evaluate a health system initiative that uses a  
47 machine learning algorithm to predict patients with a higher risk of short-term mortality and then  
48 prompts oncologists to SICs with these patients. In partnership with the health system, this will  
49 be conducted as a cluster-randomized trial to evaluate its effect.

## 50 **2. Overall objectives**

51 The objective of the study is to evaluate the effect of a health system initiative using machine  
52 learning algorithms and behavioral nudges to prompt oncologists to have serious illness  
53 conversations with patients at high-risk of short-term mortality.

## 54 **3. Aims**

### 55 *3.1 Primary outcome*

56 The primary outcome is change in the proportion of patients that have an outpatient oncology  
57 visit with documentation of a serious illness conversation (SIC).

### 58 *3.2 Secondary outcome*

59 The secondary outcomes are: 1) the change in the proportion of patients who have an outpatient  
60 oncology visit and are identified as high-risk by the machine learning algorithm with  
61 documentation of a SIC; 2) the change in the proportion of patients that have an outpatient  
62 oncology visit with documentation of advanced care planning (ACP).

### 63 *3.3 Exploratory outcomes*

- 64 • Acute care utilization metrics, including Oncology Evaluation Center, ED, Inpatient and  
65 ICU admissions.
- 66 • Healthcare utilization in the last 30 days of life in Penn Medicine facilities: acute care  
67 utilization as above, plus receipt of chemotherapy in the last 30 days.

## 68 **4. Background**

69 Patients with cancer often undergo costly therapy and acute care utilization that is discordant  
70 with their wishes, particularly at the end of life.<sup>1-5</sup> Early serious illness conversations (SICs) to  
71 determine a patient's goals and values for therapy can increase goal-concordant care.<sup>6,7</sup>  
72 Nevertheless most patients with advanced cancer die without a documented SIC, including the  
73 vast majority of UPHS oncology patients in 2018.<sup>8,9</sup> A key reason for this gap may be that  
74 oncologists routinely overestimate life expectancy of patients with advanced cancer, delaying  
75 SICs until late in the disease course and resulting in aggressive care near the end of life.<sup>10,11</sup>

76 Existing prognostic aids in oncology are rarely used because they do not apply to most cancers<sup>12</sup>,  
77 <sup>13</sup>, do not identify most patients who will die within 1 year<sup>14</sup>, and require time-consuming data  
78 input<sup>15</sup>. Electronic health record (EHR)-based predictive algorithms can improve clinician  
79 decision-making in acute care settings<sup>16-18</sup>, but it is unclear whether such algorithms can guide  
80 clinicians to perform SICs. As oncologists strive to assess patients' goals earlier in the disease  
81 course, accurate prognostication is critical to inform the timing and content of these discussions.

82 --References--

- 83 1. Emanuel EJ, Young-Xu Y, Levinsky NG, et al: Chemotherapy use among Medicare beneficiaries at the  
84 end of life. *Ann Intern Med* 138:639–643, 2003
- 85 2. Earle CC, Neville BA, Landrum MB, et al: Trends in the aggressiveness of cancer care near the end of  
86 life. *J Clin Oncol* 22:315–321, 2004
- 87 3. Earle CC, Landrum MB, Souza JM, et al: Aggressiveness of cancer care near the end of life: is it a  
88 quality-of-care issue? *J Clin Oncol* 26:3860–3866, 2008
- 89 4. Chastek B, Harley C, Kallich J, et al: Health Care Costs for Patients With Cancer at the End of Life.  
90 *JOP* 8:75s-80s, 2012
- 91 5. Wen F-H, Chen J-S, Su P-J, et al: Terminally Ill Cancer Patients' Concordance Between Preferred  
92 Life-Sustaining Treatment States in Their Last Six Months of Life and Received Life-Sustaining  
93 Treatment States in Their Last Month: An Observational Study. *J Pain Symptom Manage* 56:509-518.e3,  
94 2018
- 95 6. Wright AA, Zhang B, Ray A, et al: Associations between end-of-life discussions, patient mental health,  
96 medical care near death, and caregiver bereavement adjustment. *JAMA* 300:1665–1673, 2008
- 97 7. Brinkman-Stoppelenburg A, Rietjens JAC, van der Heide A: The effects of advance care planning on  
98 end-of-life care: a systematic review. *Palliat Med* 28:1000–1025, 2014
- 99 8. National Quality Forum: Palliative and end-of-life care 2015-2016. [Internet]. Washington, DC,  
100 National Quality Forum, 2016[cited 2018 Aug 12] Available from:  
101 [http://www.qualityforum.org/Projects/n-r/Palliative\\_and\\_End-of-Life\\_Care\\_Project\\_2015-](http://www.qualityforum.org/Projects/n-r/Palliative_and_End-of-Life_Care_Project_2015-2016/Draft_Report_for_Comment.aspx)  
102 [2016/Draft\\_Report\\_for\\_Comment.aspx](http://www.qualityforum.org/Projects/n-r/Palliative_and_End-of-Life_Care_Project_2015-2016/Draft_Report_for_Comment.aspx)
- 103 9. Schubart JR, Levi BH, Bain MM, et al: Advance Care Planning Among Patients With Advanced  
104 Cancer. *JOP* JOP.18.00044, 2018
- 105 10. Christakis NA, Smith JL, Parkes CM, et al: Extent and determinants of error in doctors' prognoses in  
106 terminally ill patients: prospective cohort studyCommentary: Why do doctors overestimate?Commentary:  
107 Prognoses should be based on proved indices not intuition. *BMJ* 320:469–473, 2000
- 108 11. Sborov K, Giaretta S, Koong A, et al: Impact of Accuracy of Survival Predictions on Quality of End-  
109 of-Life Care Among Patients With Metastatic Cancer Who Receive Radiation Therapy. *JOP*  
110 *JOP*.18.00516, 2019
- 111 12. Fong Y, Evans J, Brook D, et al: The Nottingham Prognostic Index: five- and ten-year data for all-  
112 cause Survival within a Screened Population. *Ann R Coll Surg Engl* 97:137–139, 2015
- 113 13. Alexander M, Wolfe R, Ball D, et al: Lung cancer prognostic index: a risk score to predict overall  
114 survival after the diagnosis of non-small-cell lung cancer. *Br J Cancer* 117:744–751, 2017
- 115 14. Lakin JR, Robinson MG, Bernacki RE, et al: Estimating 1-Year Mortality for High-Risk Primary Care  
116 Patients Using the “Surprise” Question. *JAMA Intern Med* 176:1863–1865, 2016
- 117 15. Morita T, Tsunoda J, Inoue S, et al: The Palliative Prognostic Index: a scoring system for survival  
118 prediction of terminally ill cancer patients. *Support Care Cancer* 7:128–133, 1999
- 119 16. Parikh RB, Kakad M, Bates DW: Integrating Predictive Analytics Into High-Value Care: The Dawn  
120 of Precision Delivery. *JAMA* 315:651–652, 2016

121 17. Amarasingham R, Audet A-MJ, Bates DW, et al: Consensus Statement on Electronic Health  
122 Predictive Analytics: A Guiding Framework to Address Challenges [Internet]. EGEMS (Wash DC) 4,  
123 2016[cited 2019 Jan 11] Available from: <https://www.ncbi.nlm.nih.gov/pmc/articles/PMC4837887/>  
124 18. Bates DW, Saria S, Ohno-Machado L, et al: Big Data In Health Care: Using Analytics To Identify  
125 And Manage High-Risk And High-Cost Patients. Health Affairs 33:1123–1131, 2014  
126

## 127 5. Study design

### 128 5.1 Design

129 This study will use a stepped-wedge cluster randomized trial to evaluate a health system  
130 initiative. Oncology practices will be randomly assigned in sequential four-week blocks to  
131 receive the email prompt intervention, in which individual oncologists will receive an automated  
132 weekly email detailing 1) how many serious illness conversations they have had, 2) how their  
133 number of serious illness conversations compares to peer oncology providers across UPHS, and  
134 3) a weekly roster of their upcoming patients at high risk of short-term mortality as determined  
135 by our mortality prediction algorithm (see below), viewable on a HIPAA-compliant secure web  
136 interface. Clinicians will receive a HIPAA compliant text message on the morning of the  
137 appointment reminding them to consider a serious illness conversation with patients on the list.  
138 Providers may opt out of this reminder on the web interface containing the weekly patient roster  
139 of high risk patients. Prior to receiving the intervention, practices will receive current standard  
140 communications regarding serious illness performance until they are randomized to the  
141 intervention. Practices will be cluster-randomized to the intervention over a 16-week period,  
142 after which all practice physicians will receive the email intervention.

143 Based on clinician and health system feedback, the intervention will be modified to remove the  
144 peer comparison message. This will occur 12 weeks into the follow-up period.

145 Following the intervention, brief REDCap questionnaires will be sent to all clinicians who  
146 participated in the trial to explore perceptions of the study intervention. This survey should take  
147 no longer than five minutes for clinicians to complete and will assess their feedback on the  
148 overall intervention in addition to specific components including automated identification of  
149 patients, receiving text and email notifications, and identifying the appropriate patients. The  
150 survey will also collect basic demographic information (age, gender, practice site, and comfort  
151 with SICs).

152 Additionally, we plan to contact clinicians who participated in the intervention and invite them to  
153 share their experiences with us via a semi-structured interview. The interview guide (see  
154 **Conversation Connect Initiative Clinician Interview Guide**) was developed with feedback  
155 from the Mixed Methods Research Lab (MMRL), an organization that specializes in qualitative  
156 research methods, analysis, and human subject protections. The interview guide includes  
157 questions focused on clinicians' comfort level with SICs prior to the intervention, specific  
158 components (emails and text messages), and additional strategies that could be implemented to

159 improve rates of SICs with patients. In summary, we will use semi-structured interviews to elicit  
160 clinicians' perspectives on the Conversation Connect intervention beyond the brief REDCap  
161 surveys. Additionally, clinicians will be asked basic demographic questions regarding their age,  
162 race, gender, practice setting, and number of years in practice. We will pilot this guide with 3-5  
163 oncology clinicians and anticipate it will take approximately 20 minutes to complete. The guide  
164 may be revised to better clarify questions or adjust timing during the initial first five subject  
165 interviews. Clinicians will be interviewed at a mutually convenient time by phone. Each  
166 interview will be audio-recorded with permission from the provider and subsequently transcribed  
167 for analysis. All research personnel will have completed human subject protection modules prior  
168 to initiating the study. The MMRL will conduct all of the interviews. The MMRL will review  
169 transcripts of the interviews and iteratively develop the code book and analyze the content of the  
170 interviews.

171 Additionally, we will plan on studying the impact of the COVID-19 pandemic on the output and  
172 accuracy of our predictive model, and identify subpopulations for whom utilization declines  
173 during COVID have led to the most decrements in the predictive accuracy of the Conversation  
174 Connect predictive model. We will specifically assess heterogeneity by racial/ethnic groups  
175 (White, Black, Hispanic, Asian, and Native American), insurance status (Medicare, Medicaid,  
176 Commercial), low-income zip code, and area-level socioeconomic metrics (e.g. area-level  
177 income level), in addition to by cancer type. We will also assess the impact of COVID-related  
178 changes in predictive model output on the rate of Serious Illness Conversations documented as  
179 part of the trial.

## 180 *5.2 Study duration*

181 The study is expected to begin in June 2019 and take 10 months (16 weeks for intervention + 24  
182 weeks followup) to complete. The REDCap questionnaires are expected to be completed by  
183 March 2021. The semi-structured interviews will take place from December 2020 to June 2021.  
184 Our analysis of COVID-related impacts will take place from February 2021 to July 2021.

## 185 *5.3 Target population*

186 Medical oncology clinicians (physicians, nurse practitioners and physician assistants) and their  
187 patients at the University of Pennsylvania Health System practicing at one of two  
188 hematology/oncology practices: The Perelman Center for Advanced Medicine (PCAM) and  
189 Pennsylvania Hospital (PAH).

## 190 *5.4 Accrual*

191 Patients will accrue to the trial as their clinical practice receives the email intervention. Eight  
192 University of Pennsylvania oncology practices will be randomly assigned to one of four start  
193 dates separated by four weeks, resulting in four pairs of clinics starting the intervention two  
194 clinics at a time every four weeks over sixteen weeks. When a clinic reaches the assigned start

195 date for the intervention arm, the clinicians will begin to receive the weekly email intervention  
196 and text reminders. Based on previous studies and assuming a baseline SIC rate of 0.65 SICs per  
197 provider per 4-weeks, we believe we will have over 80% power to detect a 60% increase in SIC  
198 rates per provider per 4-weeks.

### 199 *5.5 Key inclusion criteria*

200 Oncologists must meet the following criteria to be eligible for the study:

201 1) Care for adults with cancer at the following oncology clinics at the University of Pennsylvania  
202 Health System:

203 1. Perelman Center for Advanced Medicine:

- 204 ○ Breast Oncology
- 205 ○ Gastrointestinal Oncology
- 206 ○ Genitourinary Oncology
- 207 ○ Lymphoma
- 208 ○ Melanoma and Central Nervous System Oncology (grouped together due to low  
209 number of providers)
- 210 ○ Myeloma
- 211 ○ Thoracic / Head and Neck Oncology (one group, not a combination of  
212 subspecialties)

213 2. Pennsylvania Hospital Oncology

### 214 *5.6 Key exclusion criteria*

- 215 ● Providers at these clinics who care for only patients with benign hematologic disorders or  
216 who only see genetics consults will be excluded and not receive any emails.
- 217 ● Providers who see less than 12 high-risk patients in either the pre- or post-intervention  
218 periods
- 219 ● Visits for patients with lung cancer who are enrolled in an ongoing palliative care clinical  
220 trial that may lead to more SICs.
- 221 ● Patient visits that are for oncology genetics consults (such patients may still be included  
222 if they see their primary oncologist during the trial)
- 223 ● Providers who have not undergone Serious Illness Conversation Program training

## 224 **6. Subject recruitment**

225 Information on oncology practices and their clinicians at the University of Pennsylvania Health  
226 system will be identified by department leadership. High-risk patients will be identified by  
227 applying our mortality prediction algorithm (which uses electronic health record data from  
228 Clarity, an EPIC reporting database) to weekly oncology clinic schedules.

## 229 **7. Subject compensation**

230 No compensation will be offered in the intervention or REDCap survey. We will offer clinicians  
231 who participate in the semi-structured interviews a compensation of a \$30 gift card.

## 232 **8. Study procedures**

### 233 *8.1 Consent*

234 A waiver of informed consent is requested. This is a health system initiative that will be  
235 implemented. The study is to evaluate that initiative. Therefore, physicians and their patients  
236 will not be consented as this is the standard of practice per the health system initiative. Without  
237 a waiver of the consent, the initiative would still be implemented by the health system, but the  
238 study would be infeasible. There are several additional reasons why we feel a waiver of consent  
239 should be granted. First, it is not feasible to consent every physician and as mentioned this  
240 initiative would occur with or without the study of it. Second, if members of the control group  
241 were consented, this alone could change their behavior. This could potentially disrupt the design  
242 of the study and making interpretation of the findings challenging. Third, physicians are not  
243 being forced to have serious illness conversations for their patients. Instead, they are being  
244 reminded of their patients at high-risk of mortality and receiving an email prompt regarding the  
245 number of serious illness conversations that they have had, , with opt-out text message reminders  
246 on the day of the appointment. This is no different than standard of care in which a physician  
247 would review the same information and decide to have a serious illness conversation. The  
248 initiative is simply a reminder for the physician and makes their standard of care process easier  
249 to conduct. Finally, as part of a previous quality improvement initiative, we previously  
250 interviewed 40 patients after a serious illness conversation with their oncologist. We found no  
251 evidence of harm and found that serious illness conversations were considered standard of care  
252 for patients with cancer.

253 Verbal consent will be obtained from each clinician who participates in the semi-structured  
254 interviews. See **Conversation Connect Initiative Clinician Interview Guide** for the template  
255 for verbal consent. Written consent is not necessary for this project because clinicians will not be  
256 required to participate and can opt out at any point. No patient identifying information will be  
257 provided to clinicians.

### 258 *8.2 Procedures*

259 Data on oncologists and their patients at the University of Pennsylvania Health System will be  
260 obtained from Penn Data Store and Clarity (Epic's data reporting database). Physician data  
261 includes demographic information (e.g. sex, type of medical degree, etc.) and may be also  
262 obtained from publicly available databases or websites online. The predictive algorithm  
263 identifies high-risk patients based on demographic information, information about comorbid  
264 conditions (including type of cancer; other variables like diabetes, hypertension, and chronic  
265 kidney disease, and comorbid conditions needed to calculate the Charleston Comorbidity Index;  
266 laboratory test results; and previous emergency department and hospital admissions. This

267 predictive algorithm has been validated and results are currently being submitted for publication  
268 in a medical journal. Clarity will be used to identify documentation of SICs and ACP.

269 After identifying eligible oncologists, block randomization will occur at the clinic level (noting  
270 that PCAM melanoma and CNS Oncology will be randomized together as both clinics have a  
271 low number of providers). We will obtain baseline measures and plan to stratify the  
272 randomization by those above and below median level of SICPs in March through May of 2019.

## 273 **9. Analysis plan**

274 All analyses will be conducted using intention-to-treat using the patient as the unit of analysis  
275 and clustering at the level of the oncologist. Advanced practice providers (APPs) will receive the  
276 intervention, but will be associated with the oncologist with whom they work for the purposes of  
277 the analysis. All hypothesis tests will use a two-sided alpha of 0.05 as our threshold for statistical  
278 significance.

279 The primary and secondary outcome measures will use a binary indicator representing the  
280 presences of an SIC or ACP for each patient. The primary outcome will be expressed as a  
281 standardized rate of documented SIC discussions (number of documented SIC notes / 100 unique  
282 patient visits). In the main adjusted analysis, we will fit models using generalized estimating  
283 equations cluster on oncologists, using group (oncology practices) and period (4-week  
284 increments) fixed effects and adjusting for monthly temporal trends.

285 To test the robustness of our findings, we will perform sensitivity analyses that adjusts for  
286 available patient characteristics and comorbidities such as demographics and the Charlson  
287 Comorbidity Index.

288 Additional sensitivity analyses will include:

- 289 - Including patients enrolled in aforementioned palliative care lung cancer trial
- 290 - Analyzing results clustering at the level of the clinician (oncologist or APP)

291 We will use descriptive statistics to analyze responses from our REDCap surveys.

292 The semi-structured interviews will be transcribed and uploaded to NVivo12 Plus, a data  
293 management software. We will use a modified content analysis approach with constant  
294 comparative coding to analyze the interview transcripts. We will iteratively develop a codebook  
295 following the initial interviews based on the structure of the interview guide. One of two  
296 reviewers will code each transcript, and approximately 20-25% of total transcripts will be coded  
297 by both reviewers to establish inter-reviewer reliability. The adequacy of the codebook will be  
298 periodically assessed by the reviewers in partnership with the research team and modifications  
299 will be made as their understanding of the data and emergent themes evolves over time. The  
300 reviewers will meet regularly to discuss discrepancies and update the code book as needed, with  
301 record keeping adequate to track changes to the code book and the rationale. Kappa statistics will

302 be generated to estimate inter-rater reliability. Coding will then be reviewed to summarize key  
303 themes, and representative quotes will be selected to illustrate those themes.

304 To assess the impact of the COVID-19 pandemic on rates of conversations, we will use a quasi-  
305 experimental interrupted time series analysis, using March 23<sup>rd</sup>, 2020 as the date of the COVID  
306 exposure, to assess whether the decline in overall risk scores and number of patients flagged as  
307 high risk is significantly lower during the COVID pandemic. We will use descriptive statistics to  
308 compare the distribution of demographic characteristics of high-risk patients (Conversation  
309 Connect score >10%) before and after the pandemic. We will use an interrupted time series  
310 analysis with historic control to assess the impact of the COVID pandemic on the accuracy of the  
311 Conversation Connect model; we will use several metrics (AUC, PPV, sensitivity) to define  
312 accuracy. Finally, we will use an interrupted time series analysis with historic control to assess  
313 the impact of the COVID pandemic and associated changes in risk scores with rates of serious  
314 illness conversations documented.

## 315 **10. Investigators**

316 Ravi Parikh, MD, MPP is the Principal Investigator. Dr. Parikh is an Assistant Professor in the  
317 Department of Medical Ethics and Health Policy and Medicine at the University of Pennsylvania  
318 with experience implementing pragmatic clinical trials of similar scale at the University of  
319 Pennsylvania Health System. Christopher Manz, MD, MSHP and Mitesh Patel, MD, MBA, are  
320 the co-Investigators. All investigators have experience implementing similar pilot interventions  
321 as quality improvement initiatives at Chester County Hospital and Penn-Presbyterian Medical  
322 Center in 2018.

323 Dr. Manz and Dr. Parikh are supported by the Conversation Connect team and Abraham Cancer  
324 Center leadership, including:

|     |                            |                                        |
|-----|----------------------------|----------------------------------------|
| 325 | Nina R. O'Connor, MD       | Palliative Care                        |
| 326 | Justin E. Bekelman, MD     | Penn Center for Cancer Care Innovation |
| 327 | Michael Draugelis, MS      | Penn Data Science                      |
| 328 | Mitesh Patel, MD, MBA      | Penn Nudge Unit                        |
| 329 | Lynn M. Schuchter, MD      | Hematology/Oncology                    |
| 330 | Lawrence N. Shulman, MD    | Hematology/Oncology                    |
| 331 | Sujatha Changolkar         | Penn Nudge Unit                        |
| 332 | Corey Chivers, PhD         | Penn Data Science                      |
| 333 | Susan Harkness Regli, PhD  | Human Factors                          |
| 334 | Cody Cotner                | Perelman School of Medicine            |
| 335 | Lead Biostatistician (TBD) |                                        |
| 336 |                            |                                        |

## 337 **11. Human research protection**

338 *11.1 Data confidentiality*

339 Computer-based files will only be made available to personnel involved in the study through the  
340 use of access privileges and passwords. Wherever feasible, identifiers will be removed from  
341 study-related information. Precautions are already in place to ensure the data are secure by using  
342 passwords and HIPAA-compliant encryption.

### 343 *11.2 Subject confidentiality*

344 Data on physicians and patients will be obtained from Epic, Penn Data Store and Tableau. Any  
345 information that is obtained will be used only for research purposes and to inform the behavioral  
346 nudges described above. Information on individual patients will only be disclosed within the  
347 study team. All study staff will be reminded of the confidential nature of the data collected and  
348 contained in these databases.

349 Data regarding provider performance of Serious Illness Conversations are already shared among  
350 providers and will continue to be shared in unblinded fashion as part of the trial. Data regarding  
351 acute care utilization in the last 30 days for a provider's deceased patient panel will be shared  
352 amongst providers as well. This will occur as part of the intervention but is planned to occur  
353 occur regardless of trial approval as part of quality improvement efforts.

354 Data will be stored, managed, and analyzed on a secure, encrypted server behind the University  
355 of Pennsylvania Health System (UPHS) firewall. The primary investigator (Dr. Patel) and  
356 statistical analyst will be blinded to the randomization schema and which groups are receiving  
357 the intervention. This server was created for projects conducted by the Penn Medicine Nudge  
358 Unit related to physician and patient behavior at UPHS. All study personnel that will use this  
359 data are listed on the IRB application and have completed training in HIPAA standards and the  
360 CITI human subjects research. Data access will be password protected. Whenever possible, data  
361 will be deidentified for analysis.

### 362 *11.3 Subject privacy*

363 All efforts will be made by study staff to ensure subject privacy. Data will be evaluated in a de-  
364 identified manner whenever possible. We will require time and date of appointment and zip code  
365 data of trial participants to define our exposure period and link to area-level socioeconomic data  
366 from the American Community Survey.

### 367 *11.4 Data disclosure*

368 Information on physicians and patients will not be disclosed to anyone outside of the study team,  
369 with the exception of provider level data (SIC rates, acute care utilization) that are deliberately  
370 shared as a part of the behavioral nudges.

### 371 *11.5 Data safety and monitoring*

372 The investigators will provide oversight for the study evaluation of this health system initiative.  
373 Providers will use their clinical judgment to determine the appropriateness of initiating ACPs  
374 with patients, in accordance with standard of care.

## 375 *11.6 Risk/benefit*

### 376 *11.6.1 Potential study risks*

377 The potential risks associated with this study are minimal. Breach of data is a potential risk that  
378 will be mitigated by using HIPAA compliant and secure data platforms for the nudge  
379 interventions (name of list platform and platform used to share info w/ MAs) and evaluation  
380 (Nudge Unit server). As noted above, substantial data demonstrates that ACPs improve patient  
381 goal-concordant care without any identified harms (despite concerns that ACPs may increase  
382 psychosocial distress, the opposite has been found), so the negative impact on patients is  
383 minimal.

384 The provider data that will be shared with providers is already shared in one form (in the case of  
385 SIC rates) and is planned to be shared with providers in the near future independent of this trial  
386 (in the case of acute care utilization near the end of life), so the trial does not exposure providers  
387 to additional risk.

### 388 *11.6.2 Potential study benefits*

389 As described in the literature, patients may have improved quality of life and better goal-  
390 concordant care when exposed to ACPs, especially earlier in their disease course. An  
391 intervention that prompts providers to have an ACP with patients at a high risk of death in the  
392 next six months may increase the likelihood that these conversations occur and that they occur  
393 earlier in the disease course. However, it is possible that patients will receive no benefit from this  
394 study.

### 395 *11.6.3 Risk/benefit assessment*

396 The risk/benefit ratio is highly favorable given the potential benefit from eligible patients having  
397 an SIC or ACP discussion with their provider and benefitting from better goal-concordant care  
398 and that efforts have been put into place to minimize the risk of breach of data.

399

400
