# Supplementary material for: Long-term Effect of Machine Learning–Triggered Behavioral Nudges on Serious Illness Conversations and End-of-Life Outcomes Among Patients With Cancer: A Randomized Clinical Trial
Source: PubMed Central journal article supplement (PMC9857721; doi:10.1001/jamaoncol.2022.6303), 2023-01-12
Supplement: jamaoncol-e226303-s002.pdf [file jamaoncol-e226303-s002.pdf]

## Supplemental Online Content

Manz CR, Zhang Y, Chen K, et al. Long-term effect of machine learning–triggered behavioral nudges on serious illness conversations and end-of-life outcomes among patients with cancer: a randomized clinical trial. *JAMA Oncol*. Published online January 12, 2023.  
doi:10.1001/jamaoncol.2022.6303

**eTable 1.** Characteristics of Patients With Clinician Encounters

**eTable 2.** Subgroup Analyses

This supplemental material has been provided by the authors to give readers additional information about their work.

**eTable 1. Characteristics of Patients With Clinician Encounters**

| Characteristic                    | All patient encounters, No. (%) |                           | Standardized mean difference | Encounters with high-risk patients, No. (%) <sup>a</sup> |                         | Standardized mean difference | Encounters with non-high-risk patients, No. (%) |                           | Standardized mean difference |
|-----------------------------------|---------------------------------|---------------------------|------------------------------|----------------------------------------------------------|-------------------------|------------------------------|-------------------------------------------------|---------------------------|------------------------------|
|                                   | Control (n = 12 356)            | Intervention (n = 28 665) |                              | Control (n = 1754)                                       | Intervention (n = 3766) |                              | Control (n = 10 602)                            | Intervention (n = 24 899) |                              |
| Age, mean (SD), y                 | 62.5 (13.9)                     | 61.6 (14.5)               | -0.06                        | 65.4 (12.7)                                              | 64.4 (13.2)             | -0.08                        | 62.0 (14.0)                                     | 61.1 (14.7)               | -0.05                        |
| Female                            | 6515 (52.7)                     | 15 744 (54.9)             | 0.04                         | 865 (49.3)                                               | 1875 (49.8)             | 0.01                         | 5650 (53.3)                                     | 13 869 (55.7)             | 0.04                         |
| Male                              | 5841 (47.3)                     | 12 921 (45.1)             |                              | 889 (50.7)                                               | 1891 (50.2)             |                              | 4952 (46.7)                                     | 11 030 (44.3)             |                              |
| Race and ethnicity                |                                 |                           | 0.03                         |                                                          |                         | 0.04                         |                                                 |                           | 0.03                         |
| Non-Hispanic Black                | 2496 (20.2)                     | 5679 (19.8)               |                              | 381 (21.7)                                               | 801 (21.3)              |                              | 2115 (19.9)                                     | 4878 (19.6)               |                              |
| Non-Hispanic White                | 8765 (70.9)                     | 20 142 (70.3)             |                              | 1239 (70.7)                                              | 2674 (71.0)             |                              | 7526 (71.0)                                     | 17 468 (70.2)             |                              |
| Other <sup>b</sup>                | 1095 (8.9)                      | 2844 (9.9)                |                              | 134 (7.6)                                                | 291 (7.7)               |                              | 961 (9.1)                                       | 2553 (10.3)               |                              |
| Insurance                         |                                 |                           | 0.08                         |                                                          |                         | 0.08                         |                                                 |                           | -0.02                        |
| Commercial                        | 5447 (44.1)                     | 13 383 (46.7)             |                              | 634 (36.1)                                               | 1469 (39)               |                              | 4813 (45.4)                                     | 11 914 (47.8)             |                              |
| Medicare                          | 6157 (49.8)                     | 13 324 (46.5)             |                              | 1007 (57.5)                                              | 2010 (53.3)             |                              | 5150 (48.6)                                     | 11 314 (45.4)             |                              |
| Medicaid                          | 752 (6.1)                       | 1958 (6.8)                |                              | 113 (6.4)                                                | 287 (7.7)               |                              | 639 (6.0)                                       | 1671 (6.7)                |                              |
| Cancer type <sup>c</sup>          |                                 |                           | 0.69                         |                                                          |                         | 0.73                         |                                                 |                           | 0.76                         |
| Breast                            | 2034 (16.5)                     | 3657 (12.8)               |                              | 252 (14.3)                                               | 399 (10.6)              |                              | 1782 (17.0)                                     | 3258 (13.0)               |                              |
| Central nervous system + melanoma | 778 (6.3)                       | 2268 (7.9)                |                              | 98 (5.6)                                                 | 281 (7.5)               |                              | 680 (6.4)                                       | 1987 (8.0)                |                              |
| Gastrointestinal                  | 660 (5.3)                       | 4558 (15.9)               |                              | 119 (6.7)                                                | 828 (21.9)              |                              | 541 (5.1)                                       | 3730 (15.0)               |                              |
| General oncology                  | 2203 (17.8)                     | 7297 (25.5)               |                              | 223 (12.6)                                               | 650 (17.3)              |                              | 1980 (19.0)                                     | 6647 (27.0)               |                              |
| Genitourinary                     | 1829 (14.8)                     | 1803 (6.3)                |                              | 265 (15.3)                                               | 226 (6)                 |                              | 1564 (15.0)                                     | 1577 (6.3)                |                              |
| Myeloma                           | 2609 (21.1)                     | 2459 (8.6)                |                              | 403 (23.1)                                               | 389 (10.3)              |                              | 2206 (21.0)                                     | 2070 (8.3)                |                              |
| Lymphoma                          | 542 (4.4)                       | 4065 (14.2)               |                              | 60 (3.4)                                                 | 424 (11.3)              |                              | 482 (4.5)                                       | 3641 (15.0)               |                              |
| Thoracic                          | 1701 (13.8)                     | 2558 (8.9)                | 334 (19)                     | 569 (15.1)                                               | 1367 (13)               | 1989 (8.0)                   |                                                 |                           |                              |

|                                                     |                |               |       |                  |                  |       |               |               |       |
|-----------------------------------------------------|----------------|---------------|-------|------------------|------------------|-------|---------------|---------------|-------|
| Charlson Comorbidity Index score, median (IQR)      | 3 (2-8)        | 2 (2-8)       | -0.11 | 8 (3-9)          | 8 (3-9)          | -0.15 | 2 (2-8)       | 2 (2-5)       | -0.09 |
| Predicted mortality risk, median (IQR) <sup>d</sup> | 3.5 (1.6-11.2) | 2.5 (1.4-8.4) | -0.06 | 30.0 (19.1-46.7) | 28.0 (16.0-46.0) | -0.07 | 3.0 (1.0-6.0) | 2.0 (1.0-5.0) | -0.12 |
| Encounters with high-risk patients (% of total)     | 1754 (14.2)    | 3766 (13.1)   | NA    | NA               | NA               | NA    | NA            | NA            | NA    |

Abbreviation: NA, not applicable.

<sup>a</sup>High-risk patients were defined as having a 10% or greater risk of death within 180 days, as identified by a prospectively validated machine learning algorithm.

<sup>b</sup>Other included American Indian, Asian, East Indian, Hispanic Black, Hispanic White, and Pacific Islander.

<sup>c</sup>Imbalances between control and intervention groups were due to staggered intervention start times in the stepped-wedge design.

<sup>d</sup>Mortality risk at 180 days in absolute percentage points, as predicted by the mortality prediction algorithm.

**eTable 2. Subgroup Analyses**

| Serious Illness Conversation  | Control          | Intervention      | Adjusted Odds Ratio for Intervention Relative to Control | P Value <sup>b</sup> |
|-------------------------------|------------------|-------------------|----------------------------------------------------------|----------------------|
|                               |                  |                   | (95% CI) <sup>a</sup>                                    |                      |
| <b>All patient encounters</b> | 1.3% (158/12356) | 4.4% (1262/28665) | 2.09 (1.53-2.87)                                         | <.0001               |
| <b>Fully Adjusted Model</b>   | -                | -                 | 2.09 (1.53-2.87)                                         | <.0001               |
| <b>Subgroup analyses</b>      |                  |                   |                                                          |                      |
| Age                           |                  |                   |                                                          |                      |
| 18-35 years                   | 0.4% (3/702)     | 1.7% (34/2010)    | Ref                                                      | Ref                  |
| 36-50 years                   | 1% (16/1568)     | 2.7% (111/4109)   | 0.68 (0.18-2.54)                                         | 0.5621               |
| 51-64 years                   | 1.5% (64/4186)   | 4.6% (428/9301)   | 0.79 (0.24-2.67)                                         | 0.7102               |
| ≥ 65 years                    | 1.3% (75/5900)   | 5.2% (689/13242)  | 1.12 (0.35-3.6)                                          | 0.855                |
| Gender                        |                  |                   |                                                          |                      |
| Female                        | 1.3% (86/6515)   | 4% (625/15744)    | Ref                                                      | Ref                  |
| Male                          | 1.2% (72/5841)   | 4.9% (637/12921)  | 1.28 (0.84-1.96)                                         | 0.2476               |
| Race/Ethnicity                |                  |                   |                                                          |                      |
| White non-Hispanic            | 1.3% (111/8765)  | 4.2% (856/20142)  | Ref                                                      | Ref                  |
| Black non-Hispanic            | 1.5% (37/2496)   | 4.7% (267/5679)   | 0.93 (0.54-1.61)                                         | 0.7936               |
| Other                         | 0.9% (10/1095)   | 4.9% (139/2844)   | 1.55 (0.59-4.05)                                         | 0.3722               |
| Insurance                     |                  |                   |                                                          |                      |
| Commercial                    | 1.2% (67/5447)   | 3.4% (456/13383)  | Ref                                                      | Ref                  |
| Medicare                      | 1.4% (84/6157)   | 5.3% (705/13324)  | 1.5 (0.96-2.35)                                          | 0.0732               |
| Medicaid                      | 0.9% (7/752)     | 5.2% (101/1958)   | 2.19 (1.1-4.37)                                          | 0.0265               |
| Predicted mortality risk      |                  |                   |                                                          |                      |
| 0.0 - 0.1                     | 0.4% (32/8413)   | 1.3% (276/20865)  | Ref                                                      | Ref                  |
| >0.1 to 0.2                   | 1.6% (23/1417)   | 8% (216/2699)     | 1.67 (0.94-2.96)                                         | 0.0784               |
| >0.2 to 0.3                   | 1.7% (11/647)    | 14% (162/1154)    | 2.81 (1.45-5.45)                                         | 0.0022               |
| >0.3 to 0.4                   | 3.9% (15/386)    | 17.3% (129/745)   | 1.64 (0.82-3.3)                                          | 0.1624               |
| >0.4 to 0.5                   | 4.7% (12/253)    | 20.9% (109/522)   | 1.79 (0.67-4.78)                                         | 0.2434               |
| >0.5                          | 12% (47/391)     | 32.4% (275/850)   | 1.06 (0.56-2.01)                                         | 0.8582               |
| Marital Status                |                  |                   |                                                          |                      |

|                                     |                |                  |                  |        |
|-------------------------------------|----------------|------------------|------------------|--------|
| Single                              | 1.7% (42/2457) | 4% (245/6056)    | Ref              | Ref    |
| Married                             | 1.1% (86/7753) | 4.2% (737/17699) | 1.59 (0.98-2.57) | 0.0611 |
| Other                               | 1.4% (30/2146) | 5.7% (280/4910)  | 1.76 (0.87-3.54) | 0.1153 |
| <b>High-risk patient encounters</b> |                |                  |                  |        |
|                                     | 3.4% (59/1754) | 13.5% (510/3765) | 2.62 (1.84-3.72) | <.0001 |
| <b>Fully Adjusted Model</b>         |                |                  |                  |        |
|                                     | -              | -                | 2.62 (1.84-3.72) | <.0001 |
| <b>Subgroup analyses</b>            |                |                  |                  |        |
| Age <sup>c</sup>                    |                |                  |                  |        |
| 18-35 years                         | 0% (0/50)      | 15.3% (21/137)   |                  |        |
| 36-50 years                         | 0.8% (1/131)   | 11.6% (39/335)   |                  |        |
| 51-64 years                         | 5.7% (32/558)  | 11.9% (142/1191) |                  |        |
| ≥ 65 years                          | 2.6% (26/1015) | 14.7% (308/2102) |                  |        |
| Gender                              |                |                  |                  |        |
| Female                              | 4% (35/865)    | 13.9% (260/1869) | Ref              | Ref    |
| Male                                | 2.7% (24/889)  | 13.2% (250/1896) | 1.41 (0.66-3.02) | 0.3776 |
| Race/Ethnicity                      |                |                  |                  |        |
| White non-Hispanic                  | 3.6% (45/1240) | 12.8% (341/2662) | Ref              | Ref    |
| Black non-Hispanic                  | 3.2% (12/380)  | 16.1% (130/809)  | 1.44 (0.49-4.19) | 0.5067 |
| Other                               | 1.5% (2/134)   | 13.3% (39/294)   | 2.43 (0.32-18.2) | 0.3889 |
| Insurance <sup>c</sup>              |                |                  |                  |        |
| Commercial                          | 4.4% (28/633)  | 10.7% (157/1468) |                  |        |
| Medicare                            | 3.1% (31/1008) | 14.8% (297/2007) |                  |        |
| Medicaid                            | 0% (0/113)     | 19.3% (56/290)   |                  |        |
| Marital Status                      |                |                  |                  |        |
| Single                              | 4.6% (16/346)  | 14.8% (108/730)  | Ref              | Ref    |
| Married                             | 3.5% (38/1076) | 12.8% (289/2261) | 1.18 (0.47-2.96) | 0.7192 |
| Other                               | 1.5% (5/332)   | 14.6% (113/774)  | 3.2 (0.96-10.64) | 0.0576 |

<sup>a</sup> Subgroup analyses adjusted for intervention, clinic group, and wedge, and clustered at the oncologist level.

<sup>b</sup> P-values are from interaction models, adjusted for intervention, clinic group, wedge, and subgroup:intervention interaction term.

<sup>c</sup> Odds ratios and p-values could not be generated because regression models could not generate results if subgroups had low sample size
