# Supplementary material for: Long-term Effect of Machine Learning–Triggered Behavioral Nudges on Serious Illness Conversations and End-of-Life Outcomes Among Patients With Cancer: A Randomized Clinical Trial
Source: PubMed Central journal article supplement (PMC9857721; doi:10.1001/jamaoncol.2022.6303), 2023-01-12
Supplement: jamaoncol-e226303-s003.pdf [file jamaoncol-e226303-s003.pdf]

## Data Sharing Statement

Manz. Long-term Effect of Machine Learning-Triggered Behavioral Nudges on Serious Illness Conversations and End-of-Life Outcomes Among Patients With Cancer. *JAMA Oncol.* Published January 12, 2023. doi:10.1001/jamaoncol.2022.6303

### Data

**Data available:** Yes

**Data types:** Deidentified participant data

**How to access data:** [ravi.parikh@penmedicine.upenn.edu](mailto:ravi.parikh@penmedicine.upenn.edu)

**When available:** With publication

### Supporting Documents

**Document types:** None

### Additional Information

**Who can access the data:** researchers whose proposed use of the data has been approved

**Types of analyses:** Secondary data analysis

**Mechanisms of data availability:** After approval of a proposal and with a signed data access agreement

**Any additional restrictions:** None
